# Supplementary material for: 3D genome evolution and reorganization in the Drosophila melanogaster species group
Source: PubMed Central journal article supplement (PMC7746282; doi:10.1371/journal.pgen.1009229), 2020-12-07
Supplement: pgen.1009229.s010.pdf [file pgen.1009229.s010.pdf]

|                                | <b>Nanopore Sequencing (this study)</b> | <b>Nanopore Sequencing (combined)</b> | <b>200M Genome Assembly</b> | <b>Post Control Hi-C Quality and Scaffold-ing</b> |
|--------------------------------|-----------------------------------------|---------------------------------------|-----------------------------|---------------------------------------------------|
| Number of Sequences/Contigs    | 633,844                                 | 1,043,600                             | 1,098                       | 302                                               |
| Sum of Sequence/Contig Length  | 6,514,819,227                           | 10,462,257,773                        | 268,538,400                 | 198,798,533                                       |
| Average Sequence/Contig Length | 10,278                                  | 10,025                                | 244,570.49                  | 658,273                                           |
| Median Sequence Length         | 7,405                                   | 6,549                                 | 60,582.50                   | 24,380                                            |
| Longest Sequence Length        | 123,032                                 | 238,837                               | 7,592,683                   | 37,891,417                                        |
| N50                            | –                                       | –                                     | 1,274,151                   | 34,538,105                                        |
