# Supplementary material for: 3D genome evolution and reorganization in the Drosophila melanogaster species group
Source: PubMed Central journal article supplement (PMC7746282; doi:10.1371/journal.pgen.1009229), 2020-12-07
Supplement: pgen.1009229.s011.pdf [file pgen.1009229.s011.pdf]

| <b>Species</b>         | <b>Replicate</b> | <b>Total number of read pairs</b> | <b>Pairs mappable, unique and high quality</b> | <b>Pairs used</b> |
|------------------------|------------------|-----------------------------------|------------------------------------------------|-------------------|
| <i>D. melanogaster</i> | 1                | 126758371                         | 65470274                                       | 41063921          |
| <i>D. melanogaster</i> | 2                | 157512176                         | 71652238                                       | 45294778          |
| <i>D. triauraria</i>   | 1                | 56128496                          | 18491258                                       | 14551364          |
| <i>D. triauraria</i>   | 2                | 57584713                          | 19513854                                       | 15023262          |
