# Supplementary material for: 3D genome evolution and reorganization in the Drosophila melanogaster species group
Source: PubMed Central journal article supplement (PMC7746282; doi:10.1371/journal.pgen.1009229), 2020-12-07
Supplement: pgen.1009229.s012.pdf [file pgen.1009229.s012.pdf]

| <b>Species</b>         | <b>Boundaries</b>      |                       | <b>Domains</b>         |                       |
|------------------------|------------------------|-----------------------|------------------------|-----------------------|
|                        | <b>High Confidence</b> | <b>Low Confidence</b> | <b>High Confidence</b> | <b>Low Confidence</b> |
| <i>D. melanogaster</i> | 701                    | 249                   | 552                    | 593                   |
| <i>D. triauraria</i>   | 843                    | 355                   | 639                    | 811                   |
