# Supplementary material for: 3D genome evolution and reorganization in the Drosophila melanogaster species group
Source: PubMed Central journal article supplement (PMC7746282; doi:10.1371/journal.pgen.1009229), 2020-12-07
Supplement: pgen.1009229.s013.pdf [file pgen.1009229.s013.pdf]

| <b>Category</b>                                      | <b>Boundaries</b> | <b>Domains</b> |
|------------------------------------------------------|-------------------|----------------|
| Total in <i>D. triauraria</i>                        | 834               | 639            |
| Unique lifted over to <i>D. melanogaster</i>         | 798               | 637            |
| Orthologous                                          | 503               | 117            |
| Non-orthologous                                      | 295               | 520            |
| Non-orthologous (truncated/expanded)                 | –                 | 73             |
| Non-orthologous (split by lineage-specific boundary) | –                 | 198            |
| Non-orthologous (split by rearrangement)             | –                 | 249            |
| Missing                                              | 36                | 2              |
