# Supplementary material for: 3D genome evolution and reorganization in the Drosophila melanogaster species group
Source: PubMed Central journal article supplement (PMC7746282; doi:10.1371/journal.pgen.1009229), 2020-12-07
Supplement: pgen.1009229.s014.pdf [file pgen.1009229.s014.pdf]

| <b>Motif Comparison</b> | <b>Boundaries</b> |
|-------------------------|-------------------|
| More                    | 136               |
| Fewer                   | 95                |
| Same                    | 72                |
