# Supplementary material for: 3D genome evolution and reorganization in the Drosophila melanogaster species group
Source: PubMed Central journal article supplement (PMC7746282; doi:10.1371/journal.pgen.1009229), 2020-12-07
Supplement: pgen.1009229.s015.pdf [file pgen.1009229.s015.pdf]

| <b>Chromatin State</b> | <b>Orthologous TADs: number of genes</b> | <b>Non-orthologous TADs: number of genes</b> |
|------------------------|------------------------------------------|----------------------------------------------|
| BLACK                  | 719                                      | 2156                                         |
| BLUE                   | 247                                      | 861                                          |
| GREEN                  | 20                                       | 357                                          |
| RED                    | 116                                      | 516                                          |
| YELLOW                 | 551                                      | 3373                                         |
